# Supplementary material
Source: PubMed Central journal article supplement (PMC7091798)
Supplement: 41422_2008_BFcr2008294_MOESM222_ESM.pdf [file 41422_2008_BFcr2008294_MOESM222_ESM.pdf]

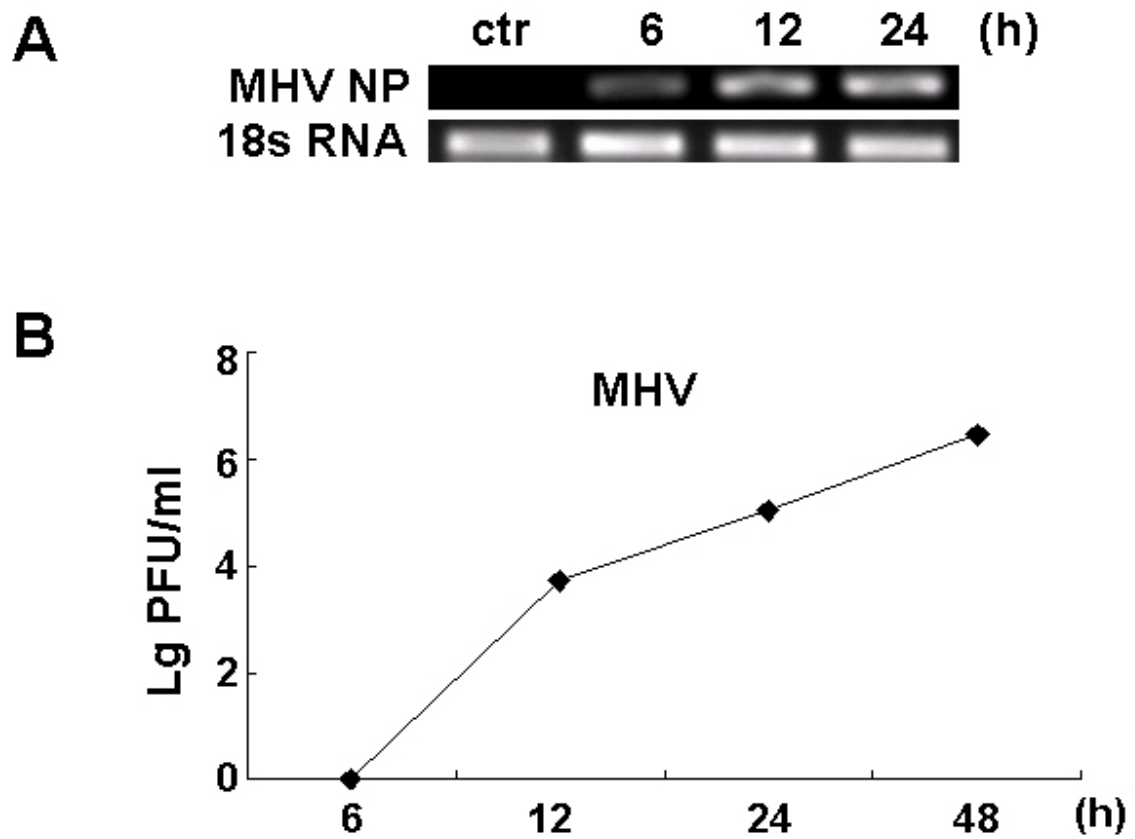

**Supplementary Figure 1** Proliferation of MHV-A59 in MEFs. WT MEFs were infected with MHV-A59 (MOI = 1). **(A)** At the indicated time points post-infection, total RNA was extracted and the mRNA level of MHV-A59 N gene was determined by RT-PCR. **(B)** The titer of MHV-A59 in the medium was determined by plaque assay and the result was expressed as Lg PFU/ml. The data represented at least three independent experiments.
