# Supplementary material
Source: PubMed Central journal article supplement (PMC7091798)
Supplement: 41422_2008_BFcr2008294_MOESM223_ESM.pdf [file 41422_2008_BFcr2008294_MOESM223_ESM.pdf]

**A**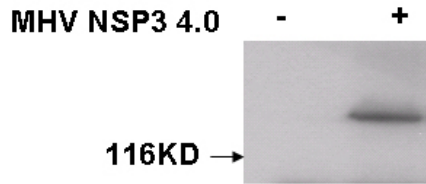**B**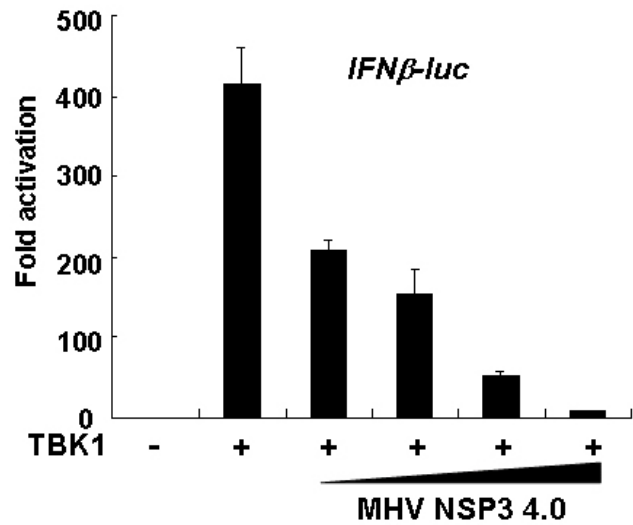

**Supplementary Figure 2** Partial fragment of MHV NSP3 can inhibit type I interferon signal pathway. **(A)** Expression of MHV NSP3 4.0. Construct pCMV-Myc-MHVNSP34.0 was transfected into HEK293T cells, and expression of the construct was detected by western blot with the anti-Myc antibody. **(B)** Plasmid expressing TBK1 (100 ng) was transiently co-transfected without or with increasing amounts of pCMV-Myc-MHVNSP34.0 plasmid (50-400 ng). IFN $\beta$ -Luc reporter plasmid (30 ng) together with Renilla luciferase internal control plasmid (15 ng) was co-transfected for 24 h; the luciferase activities were determined and normalized based on Renilla luciferase activity. Data were expressed as fold activation (mean  $\pm$  SD).
