# Supplementary material
Source: PubMed Central journal article supplement (PMC7091798)
Supplement: 41422_2008_BFcr2008294_MOESM224_ESM.pdf [file 41422_2008_BFcr2008294_MOESM224_ESM.pdf]

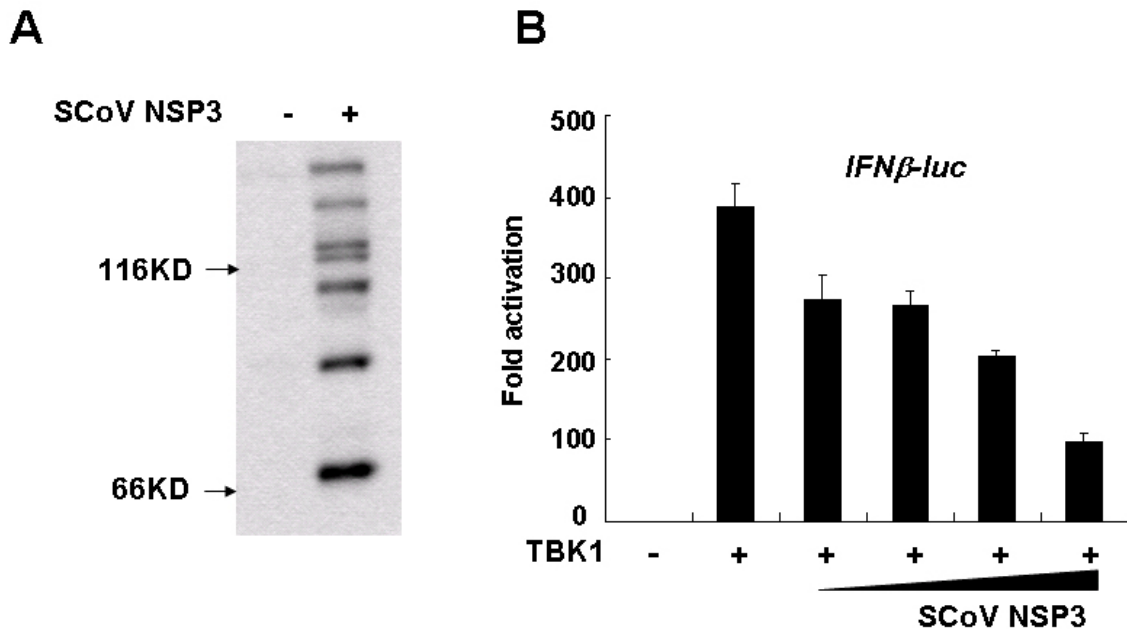

**Supplementary Figure 3** SARS coronavirus NSP3 can inhibit type I interferon signal pathway. **(A)** Expression of SCoV NSP3. Construct pCD $\beta$ A-SCoVNSP3 was transfected into HEK293T cells; expression of the construct was detected by western blot with the anti-Flag antibody. **(B)** Plasmid expressing TBK1 (100 ng) was transiently co-transfected without or with increasing amounts of pCD $\beta$ A-NSP3 plasmid (50-400 ng). IFN $\beta$ -Luc reporter plasmid (30 ng) together with Renilla luciferase internal control plasmid (15 ng) was co-transfected for 24 h; the luciferase activities were determined and normalized based on Renilla luciferase activity. Data were expressed as fold activation (mean  $\pm$  SD).
